# Supplementary material
Source: PubMed Central journal article supplement (PMC5630161)
Supplement: mmc1.pdf [file mmc1.pdf]

**The American Journal of Human Genetics, Volume 101**

**Supplemental Data**

**Female Infertility Caused by Mutations**

**in the Oocyte-Specific Translational Repressor *PATL2***

**Sateesh Maddirevula, Serdar Coskun, Saad Alhassan, Atif Elnour, Hessa S. Alsaif, Niema Ibrahim, Firdous Abdulwahab, Stefan T. Arold, and Fowzan S. Alkuraya**

## Supplemental Note

### Case #1 (Family 1\_IV:19):

23 years old lady with primary infertility for 7 years. Married to a 29 years old gentleman.

#### Gynecological history:

Normal menarche, regular cycles, no hirsutism, no acne or galactorrhea no dysmenorrhea, no history of PID, endometriosis, or pelvic surgeries. Not on any hormonal treatment or contraception.

#### Family history:

She gave history of similar infertility concerns in one of her younger sisters (see Case #2 below).

#### Previous fertility assessment diagnosis & treatment:

- Hormonal profile: hyperprolactinemia on bromocriptine 1.25mg PO OD, last prolactin level 49. FSH = 5.3. LH = 12.4. TSH 5.99
- Underwent 6 ovulation induction cycles via clomiphene citrate. Then 5 ovulation inductions by gonadotropins with timed intercourse.

#### Partner history:

29 years old gentleman who is medically & surgically free. Not using any medication. Doesn't have any allergies. Non-smoker.

Semen analysis: 6.3 ml, 25 mil/ml, 38% motile, 96% abnormal forms, TMC = 58.950000, acrosome deficiencies 59%

#### Workup:

- Weight = 44 Kg, Height = 146 cm, BMI = 20.6
- Blood group A+
- Hb = 116 g/L
- FSH = 6.6 IU/L
- LH = 5.5 IU/L
- Estradiol level = 150 pmol/L
- TSH = 2.8
- Prolactin level = 14.5

- Rubella Immune
- AFC 10 +6
- HSG films reviewed: Right tubal block with normal left tube & cavity

**Infertility diagnosis: Unexplained Infertility**

**Infertility treatment offered & outcome:**

**A. Super ovulation: had 2 cycle of super ovulation IUI as follows:**

**Cycle #1:** → **Super ovulation – IUI** HMG 150 IU for 6 days then increased to 187.5 IU for 5 days + 200mcg Buserlin. Had 2 follicles recruited 1 was 18 mm & the other was 15 mm. Endometrium started 2 mm became 12 mm at trigger day. Triggered oocyte maturation by 10,000 IU HCG. IUI was performed smoothly with no complications or difficulties. For luteal phase support progesterone pessary prescribed 200 mg vaginally BID for 14 days. Pregnancy test negative.

**Cycle #2:** → **Super ovulation – IUI** HMG 187.5 IU for 11 days + 200mcg Buserlin. Had 2 follicles recruited 1 was 18 mm & the other was 16 mm. endometrium started 2 mm became 13 mm at trigger day. Triggered oocyte maturation by 10,000 IU HCG. IUI was performed smoothly with no complications or difficulties. For luteal phase support progesterone pessary prescribed 200 mg vaginally BID for 14 days. Pregnancy test negative.

**B. IVF Treatment: had total of 7 cycles as follows:**

**Summary of cycles:**

**Cycle #1:** → **Long protocol** with leuprolide 3.75 IM once at follicular phase at cycle day → HMG Menogon 225 IU for 13 days then 75 IU for 1 days → triggered 10,000 IU HCG (Endometrial thickness 16mm) → 11 oocytes collected → all were GV

**Cycle #2:** → **Short protocol** → started at cycled day 4 → HMG Menogon 150 IU for 9 days then 225 IU for 5 days + Buserlin 400 mcg SC daily → triggered 10,000 IU HCG (Endometrial thickness 13mm) → 4 oocytes collected (only right ovary, left ovary not aspirated due to bladder accessibility) → all were GV

**Cycle #3:** → Long protocol (we wanted to try GnRH flexible Antagonist protocol but we didn't have antagonist in the hospital & patient couldn't afford it from outside) had leuprolide 3.75 IM once at follicular phase at cycle day → HMG Menogon 225 IU for 9 days then 300 IU for 5 days → triggered 10,000 IU HCG (Endometrial thickness 16mm) → 21 oocytes collected → all were GV

**Cycle #4:** → Short protocol → started at cycled day 4 → HMG Menogon 300 IU for 12 days → after 10 days of stimulation a leading follicle reached 15m, (LH measured on same day 5.9 iu/L, next day 3.3 iu/L the day after 3 iu/L ) → triggered Buserelin 500 mcg SC (Endometrial thickness 14mm) → 5 oocytes collected → all were GV

**Cycle #5:** → Short protocol → started at cycled day 3 → HMG Menogon 300 IU for 6 days then 375 IU for 4 days then increased to 450 IU 2 days + Buserlin 400 mcg SC daily → triggered 10,000 IU HCG (Endometrial thickness 14mm) → 2 oocytes collected → all were GV

**Cycle #6:** → Flexible antagonist protocol → started at cycled day 4 → FSH Gonal-F 300 IU for 9 days then antagonist started 0.5 Orgalotran both continued 3 days (developed 2 right hemorrhagic cyst at CD 10 ) → triggered by Superfact 0.4 ml SC (Endometrial thickness 18mm) → 13 oocytes collected → all were GV

**Cycle #7:** → Flexible antagonist protocol → started at cycled day 3 → FSH Gonal-F 300 IU for 10 days then antagonist started 0.5 Orgalotran both continued 3 days → triggered by Superfact 0.4 ml SC & HCG 10,000 IU SC (Endometrial thickness 18mm) → had 22 follicles recruited 23 oocytes collected → 14 eggs were GV's & 7 eggs degenerated.

## **Case #2 (Family 2\_IV:18):**

25 years old lady with primary infertility for 6 years, married to a 31 years old gentleman.

### **Gynecological history:**

Menarche at age of 12, cycles range 28 – 35 days with flow 5-6 days, no acne or galactorrhea, mild dysmenorrhea & no history of PID, endometriosis, pelvic surgeries. Not on any hormonal treatment or contraception.

**Past medical history:** free

**Past surgical history:** free

**Medications:** None

**Allergies:** None

### **Partner history:**

He's known to be diabetic controlled on oral hypoglycemic agents. Surgically free. Doesn't have any allergies. Nonsmoker.

### **Workup:**

- Weight = 59.7 Kg, Height = 158 cm, BMI = 23.9
- Blood group A+
- Hb = 123 g/L
- FSH = 5.6 IU/L
- LH = 14.7 IU/L
- Estradiol level = 189 pmol/L
- TSH = 2.29
- Prolactin level = 14.79
- Rubella Immune
- AFC 15+20
- Semen analysis: 1 ml, 162 mil/ml, 72% motile, 1% normal forms, TMC = 116.640000, acrosome deficiencies 77%
- HSG films reviewed: normal cavity & patent tubes

**Infertility diagnosis:** Unexplained Infertility

**Infertility treatment offered & outcome:**

1. **Short protocol** → started at cycled day 3 → HMG Menogon 150 IU for 6 days then 75 IU for 5 days then increased to 150 IU for 2 days + Buserlin 400 mcg SC daily → triggered 10,000 IU HCG (Endometrial thickness 8mm) → 4 oocytes collected → all were GV

**Figure S1**

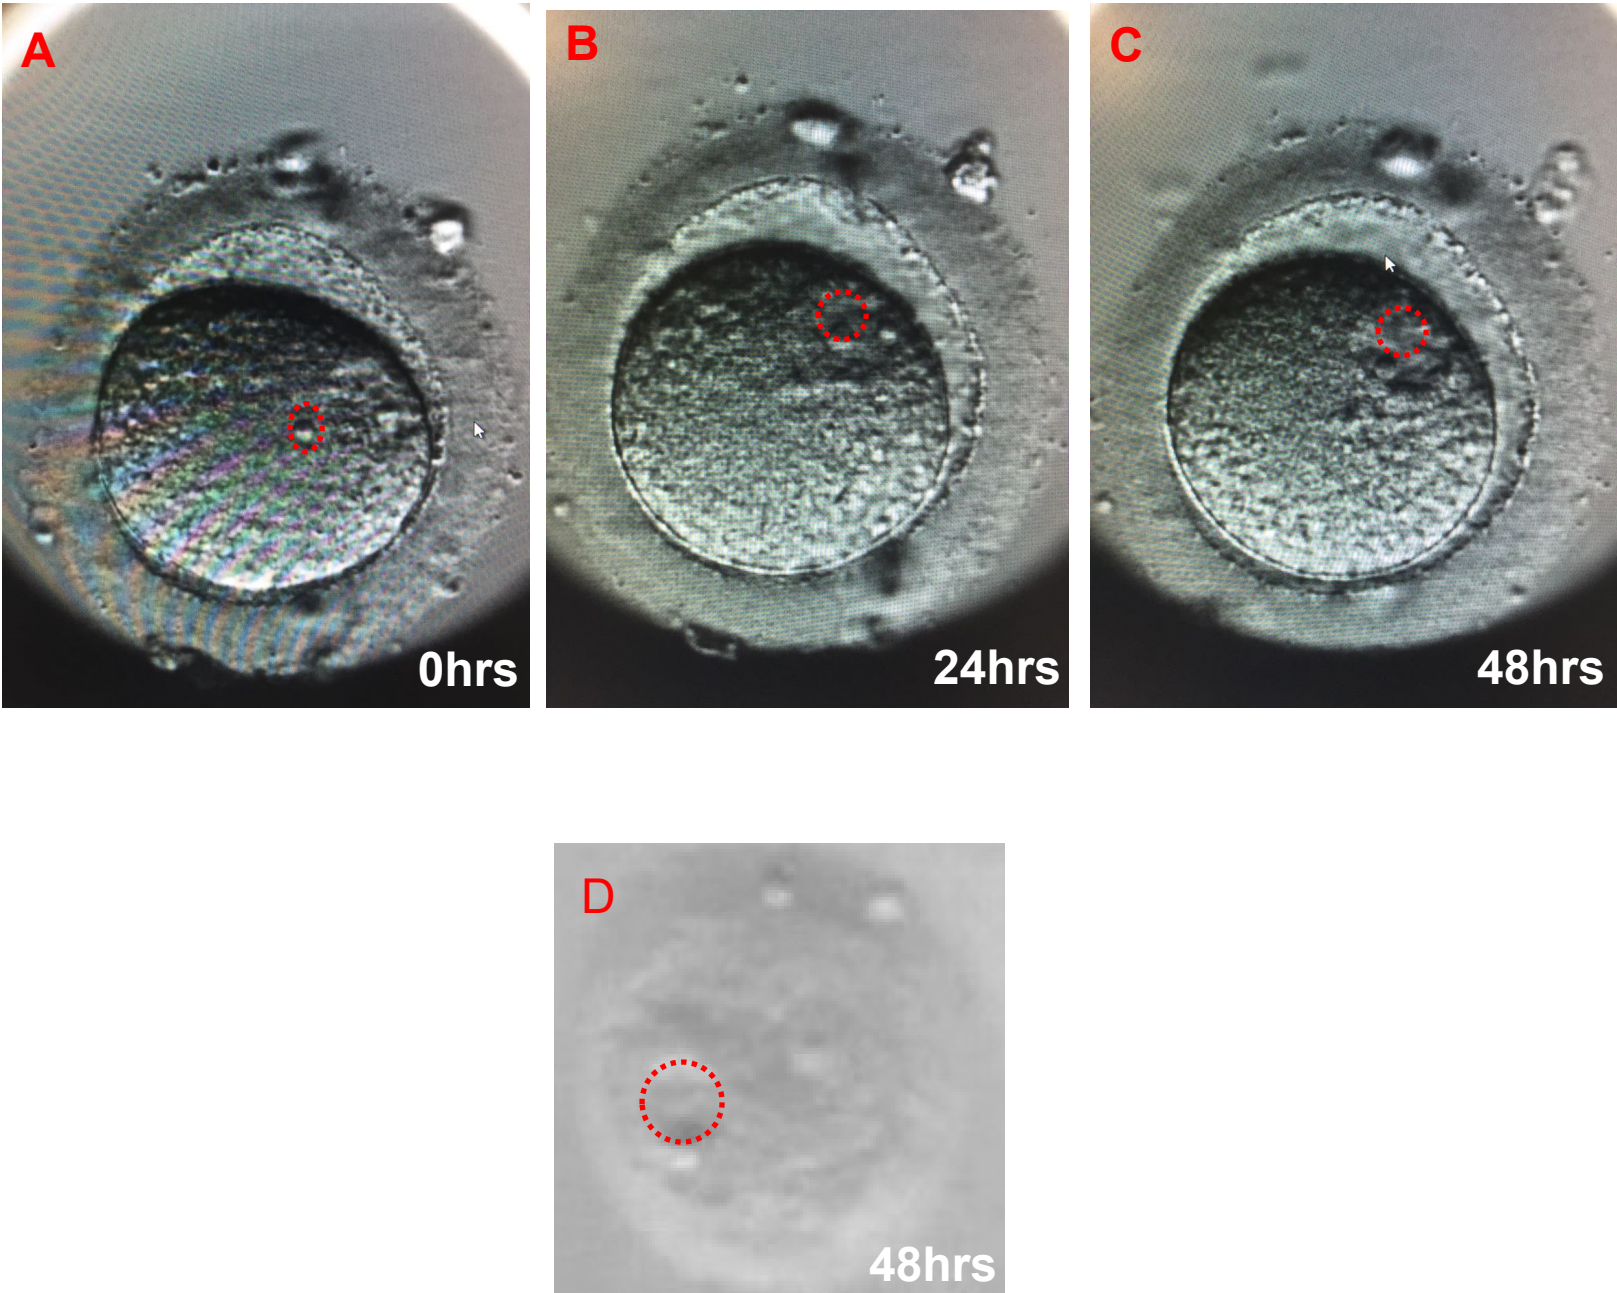

**Figure S1.** A-C) Images of immature oocytes from the individual IV:18 in family 1 with maturation arrest phenotype from family 1. Red circles indicate germinal vesicles.

D) Images of immature oocytes from individual II:4 in family 2 showing a similar defect despite the much lower quality of the image.



Figure S2

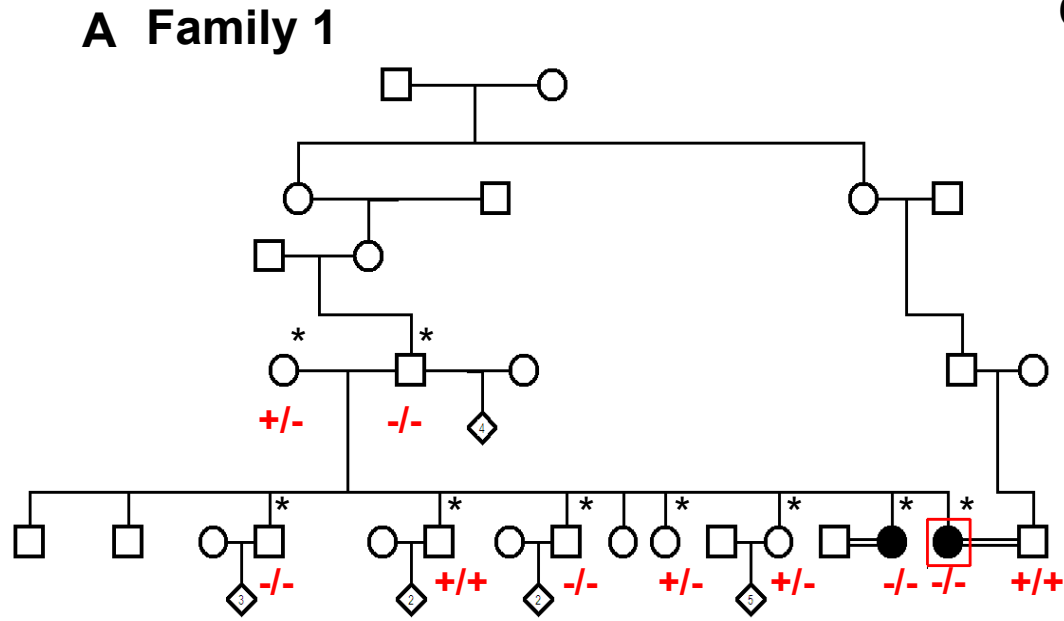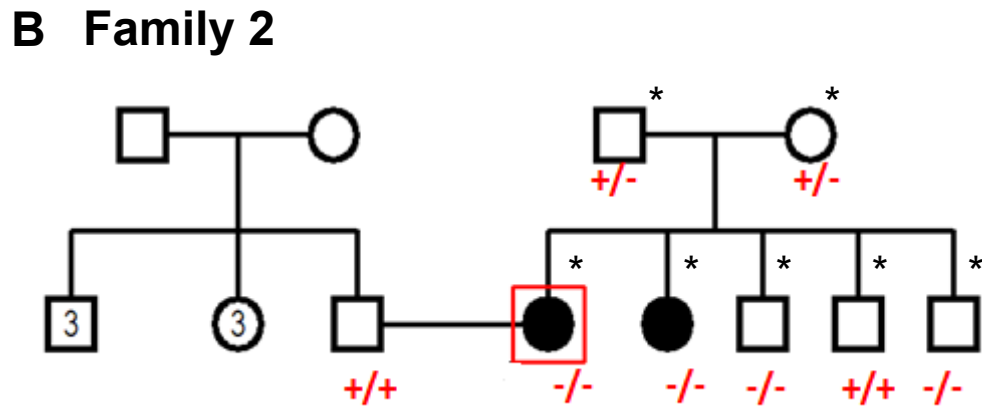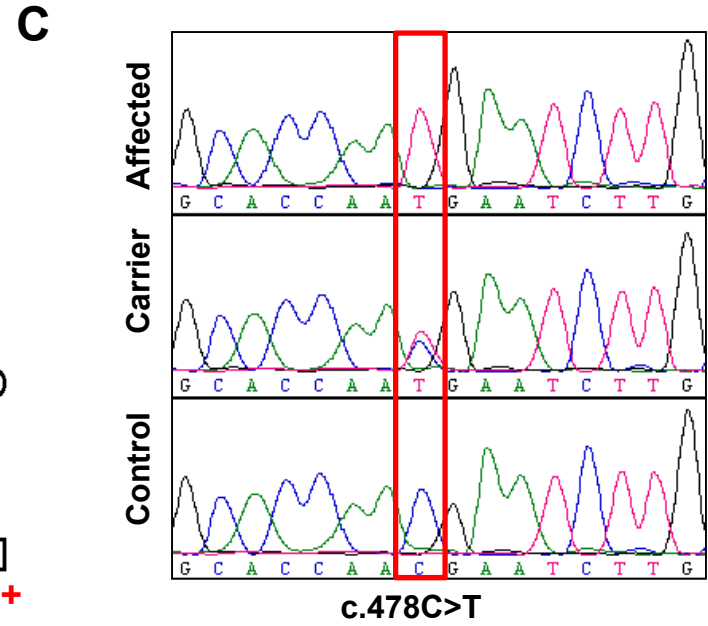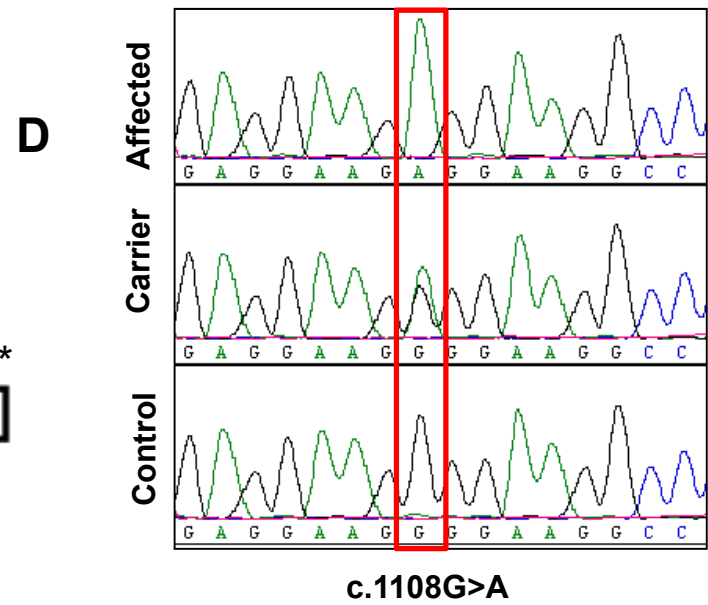

**Figure S2.** Pedigrees of family1 (A) and family 2 (B) showing the *PATL2* mutation status. Red box indicates index for whom whole exome sequence (WES) was performed. Segregation was performed for the available family members. -/- denotes homozygous status; +/- denotes carrier status; +/+ denotes wild type; \* marks individuals included in the linkage analysis. C) Chromatogram for the mutation c.478C>T:p.(Arg160\*) in family 1. D) Chromatogram for the mutation c.1108G>A:p.(Gly370Arg) in family 2.

Figure S3

|            |                                           |
|------------|-------------------------------------------|
| Yeast      | LHI---DDSSYDVNPFISMLSFDKGIKIMPRIFNFLDKQQ  |
| C.elegans  | -----VIINELMGDDLKLMQMSKGRAVITRTLKVVEPRD   |
| Drosophila | --LVNKLKAGLAFDKVIAMMNVRKGIKILIRRIMPFIADQS |
| Zebrafish  | L---RCTNLD-SGEEFLSCLLVSKGKRLVARLLPFLSHDS  |
| Xenopus    | LNMAPCHSEDESENEFLQLLQVGKGIKLIARLLPFLTRVQ  |
| Mouse      | LKTQEQNNLEEAADNLLQVLSVRKGIKVLVARLLPFLPPDQ |
| Cattle     | LKAQGQNNLEAADDGFLQALSVGKGIKALVARLLPILPRDR |
| Dog        | LKTQEQKNLEEAADGFLQVLSVRKGIKALVARLLPFLPQDQ |
| Chimpanzee | LKTQEQNNLEEAADGFLQVLSVRKGIKALVARLLPFLPQDQ |
| Human      | LKTQEQNNLEEAADGFLQVLSVRKGIKALVARLLPFLPQDQ |

**Gly370Arg**

**Figure S3.** The glycine 370 residue of PATL2 is highly conserved from human to yeast. Protein sequences were obtained publically available genomic databases: human (NM\_001145112.1), chimpanzee (XM\_001146504.2), dog (XM\_003640026.1), cattle (XM\_002691093.2), mouse (NM\_026251.2), *Xenopus* (NP\_001135679.1), zebrafish (XP\_683261.4), *Drosophila* (NP\_001287369.1), *C.elegans* (NP\_496514.1) and yeast (NP\_010002.3). PATL2 protein sequences were aligned by using ClustalW.

**Table S1: list of haplotypes from two families with in the shared ROH (chr15:42,254,070-45,702,800).**

| SNP        | Mb distance | Family 1 IV:19 | Family 1 IV:18 | Family 2 II:4 | Family 2 II:5 |
|------------|-------------|----------------|----------------|---------------|---------------|
| RS2925339  | 42091212    | ab             | ab             | BB            | BB            |
| RS1618332  | 42184794    | ab             | ab             | BB            | BB            |
| RS1048166  | 42192040    | ab             | ab             | AA            | AA            |
| RS8041458  | 42196846    | ab             | ab             | BB            | BB            |
| RS17686769 | 42205483    | ab             | ab             | BB            | BB            |
| RS4923919  | 42208041    | ab             | ab             | AA            | AA            |
| RS2899033  | 42212047    | BB             | BB             | BB            | BB            |
| RS10518742 | 42220257    | BB             | BB             | BB            | BB            |
| RS1648856  | 42233912    | AA             | AA             | BB            | BB            |
| RS1648855  | 42237403    | AA             | AA             | BB            | BB            |
| RS34899815 | 42254068    | BB             | BB             | AA            | AA            |
| RS1868831  | 42257929    | AA             | AA             | AA            | AA            |
| RS1704345  | 42270697    | ab             | ab             | AA            | AA            |
| RS4924593  | 42273259    | ab             | ab             | AA            | AA            |
| RS1668572  | 42273526    | ab             | ab             | BB            | BB            |
| RS1704352  | 42281805    | BB             | BB             | BB            | BB            |
| RS7175837  | 42300303    | ab             | ab             | BB            | BB            |
| RS1704367  | 42300475    | BB             | BB             | BB            | BB            |
| RS12438854 | 42300886    | ab             | ab             | AA            | AA            |
| RS9919954  | 42302520    | ab             | ab             | AA            | AA            |
| RS7182446  | 42302751    | BB             | BB             | BB            | BB            |
| RS12439430 | 42305042    | ab             | ab             | BB            | BB            |
| RS12909362 | 42315401    | AA             | AA             | BB            | BB            |
| RS2665203  | 42316527    | BB             | BB             | BB            | BB            |
| RS2724943  | 42319233    | ab             | ab             | AA            | AA            |
| RS4924608  | 42332784    | ab             | ab             | AA            | AA            |
| RS1668596  | 42336250    | BB             | BB             | AA            | AA            |
| RS7175879  | 42336450    | BB             | BB             | BB            | BB            |
| RS1712436  | 42338079    | BB             | BB             | BB            | BB            |
| RS1993069  | 42339158    | ab             | ab             | BB            | BB            |
| RS12902878 | 42343794    | ab             | ab             | BB            | BB            |
| RS776688   | 42345046    | ab             | ab             | AA            | AA            |
| RS16972565 | 42350013    | BB             | BB             | BB            | BB            |
| RS776699   | 42350037    | BB             | BB             | BB            | BB            |
| RS1668588  | 42364362    | BB             | BB             | BB            | BB            |
| RS59107494 | 42366224    | AA             | AA             | BB            | BB            |
| RS7166111  | 42368506    | ab             | ab             | BB            | BB            |
| RS2412657  | 42387203    | BB             | BB             | AA            | AA            |
| RS8028204  | 42392164    | AA             | AA             | BB            | BB            |
| RS17748385 | 42395956    | AA             | AA             | AA            | AA            |
| RS12050606 | 42396187    | ab             | ab             | BB            | BB            |
| RS1008979  | 42399642    | AA             | AA             | BB            | BB            |
| RS2122677  | 42400066    | AA             | AA             | AA            | AA            |
| RS675996   | 42400764    | ab             | ab             | AA            | AA            |
| RS28665345 | 42405470    | BB             | BB             | BB            | BB            |
| RS11852412 | 42409999    | ab             | ab             | BB            | BB            |

|            |          |    |    |    |    |
|------------|----------|----|----|----|----|
| RS1712440  | 42411029 | AA | AA | AA | AA |
| RS4924623  | 42411189 | ab | ab | AA | AA |
| RS1712439  | 42411286 | AA | AA | AA | AA |
| RS1712426  | 42412606 | BB | BB | AA | AA |
| RS2034521  | 42415270 | ab | ab | AA | AA |
| RS4924626  | 42423090 | ab | ab | AA | AA |
| RS2899041  | 42429490 | AA | AA | AA | AA |
| RS650392   | 42430535 | ab | ab | BB | BB |
| RS3825786  | 42431142 | AA | AA | AA | AA |
| RS648130   | 42431683 | AA | AA | AA | AA |
| RS1712442  | 42502282 | BB | BB | BB | BB |
| RS16972887 | 42522558 | BB | BB | BB | BB |
| RS16972896 | 42524104 | AA | AA | BB | BB |
| RS1679012  | 42528676 | ab | ab | AA | AA |
| RS17694281 | 42528739 | AA | AA | AA | AA |
| RS8036187  | 42533879 | AA | AA | AA | AA |
| RS8024732  | 42570718 | BB | BB | BB | BB |
| RS16972989 | 42572231 | AA | AA | AA | AA |
| RS34373997 | 42583801 | BB | BB | BB | BB |
| RS16973015 | 42585099 | AA | AA | AA | AA |
| RS12914737 | 42589317 | AA | AA | AA | AA |
| RS2412697  | 42605791 | AA | AA | AA | AA |
| RS12903690 | 42615305 | AA | AA | AA | AA |
| RS1659215  | 42619508 | AA | AA | AA | AA |
| RS16973119 | 42636303 | BB | BB | BB | BB |
| RS7181742  | 42643529 | AA | AA | AA | AA |
| RS7180279  | 42643538 | AA | AA | AA | AA |
| RS3743006  | 42645768 | BB | BB | BB | BB |
| RS28364384 | 42666499 | BB | BB | BB | BB |
| RS35249793 | 42667015 | AA | AA | AA | AA |
| RS28364405 | 42679414 | AA | AA | AA | AA |
| RS28364409 | 42679857 | AA | AA | AA | AA |
| RS28364433 | 42683630 | BB | BB | BB | BB |
| RS28364441 | 42684875 | BB | BB | BB | BB |
| RS3115877  | 42688772 | BB | BB | BB | BB |
| RS28364492 | 42694568 | BB | BB | BB | BB |
| RS28364500 | 42696606 | BB | BB | BB | BB |
| RS2412711  | 42697231 | BB | BB | BB | BB |
| RS28364517 | 42699128 | BB | BB | BB | BB |
| RS3115883  | 42701688 | BB | BB | BB | BB |
| RS3115884  | 42703406 | BB | BB | BB | BB |
| RS28364547 | 42703899 | BB | BB | BB | BB |
| RS28364550 | 42705007 | AA | AA | AA | AA |
| RS12594633 | 42705464 | AA | AA | AA | AA |
| RS34192054 | 42707820 | AA | AA | BB | BB |
| RS28621687 | 42726693 | BB | BB | BB | BB |
| RS35896246 | 42727621 | BB | BB | BB | BB |
| RS4924677  | 42729508 | BB | BB | BB | BB |

|            |          |    |    |    |    |
|------------|----------|----|----|----|----|
| RS34792942 | 42742435 | AA | AA | AA | AA |
| RS12101559 | 42742464 | AA | AA | AA | AA |
| RS12440118 | 42744094 | BB | BB | AA | AA |
| RS16973265 | 42752542 | AA | AA | BB | BB |
| RS1866396  | 42755555 | AA | AA | AA | AA |
| RS28491449 | 42761379 | BB | BB | AA | AA |
| RS4924678  | 42761436 | AA | AA | BB | BB |
| RS2617237  | 42765624 | BB | BB | AA | AA |
| RS17709596 | 42767981 | AA | AA | BB | BB |
| RS6493048  | 42787459 | BB | BB | BB | BB |
| RS34707422 | 42826154 | BB | BB | AA | AA |
| RS34359922 | 42836056 | AA | AA | AA | AA |
| RS876992   | 42878456 | BB | BB | BB | BB |
| RS28461422 | 42883883 | BB | BB | BB | BB |
| RS6493054  | 42886504 | AA | AA | AA | AA |
| RS1667493  | 42889170 | BB | BB | AA | AA |
| RS17767270 | 42898612 | AA | AA | BB | BB |
| RS17767439 | 42927182 | AA | AA | AA | AA |
| RS12594951 | 42934631 | BB | BB | BB | BB |
| RS16957063 | 42984288 | AA | AA | AA | AA |
| RS12592374 | 42991299 | AA | AA | AA | AA |
| RS17774047 | 43013226 | BB | BB | BB | BB |
| RS12917189 | 43023482 | AA | AA | AA | AA |
| RS17712677 | 43041246 | AA | AA | AA | AA |
| RS7181238  | 43062820 | BB | BB | BB | BB |
| RS11854550 | 43069014 | BB | BB | BB | BB |
| RS9920562  | 43073597 | AA | AA | AA | AA |
| RS9920935  | 43075202 | BB | BB | BB | BB |
| RS10467975 | 43097652 | BB | BB | BB | BB |
| RS7182753  | 43109385 | BB | BB | AA | AA |
| RS16957205 | 43118125 | BB | BB | BB | BB |
| RS17775525 | 43121684 | AA | AA | AA | AA |
| RS11070382 | 43151911 | AA | AA | AA | AA |
| RS28810091 | 43156253 | BB | BB | AA | AA |
| RS16957250 | 43170823 | BB | BB | BB | BB |
| RS2306126  | 43235317 | AA | -- | AA | AA |
| RS17776090 | 43235584 | AA | AA | AA | AA |
| RS16957277 | 43237572 | AA | AA | BB | BB |
| RS35069201 | 43317071 | AA | AA | AA | AA |
| RS4923956  | 43338652 | BB | BB | AA | AA |
| RS34018858 | 43342019 | AA | AA | AA | AA |
| RS4924704  | 43352041 | AA | AA | AA | AA |
| RS17720890 | 43385400 | BB | BB | AA | AA |
| RS17721275 | 43414673 | BB | BB | BB | BB |
| RS7165656  | 43423203 | BB | BB | AA | AA |
| RS2176870  | 43436410 | AA | AA | BB | BB |
| RS28365865 | 43477780 | BB | BB | BB | BB |
| RS530118   | 43478511 | AA | AA | BB | BB |

|            |          |    |    |    |    |
|------------|----------|----|----|----|----|
| RS17778356 | 43487810 | BB | BB | BB | BB |
| RS45594236 | 43494017 | BB | BB | BB | BB |
| RS35985214 | 43527819 | AA | AA | AA | AA |
| RS34448188 | 43533193 | BB | BB | BB | BB |
| RS7162827  | 43538511 | BB | BB | BB | BB |
| RS542036   | 43541139 | AA | AA | BB | BB |
| RS501884   | 43553982 | BB | BB | AA | AA |
| RS471122   | 43558574 | AA | AA | BB | BB |
| RS488756   | 43614724 | AA | AA | BB | BB |
| RS7048     | 43620073 | AA | AA | AA | AA |
| RS3917221  | 43658935 | BB | BB | BB | BB |
| RS2412778  | 43660982 | AA | AA | BB | BB |
| RS2412781  | 43667900 | AA | AA | BB | BB |
| RS999047   | 43688916 | AA | AA | BB | BB |
| RS3883     | 43695716 | BB | BB | BB | BB |
| RS3742973  | 43697459 | BB | BB | BB | BB |
| RS45608631 | 43699889 | AA | AA | AA | AA |
| RS1058298  | 43700930 | BB | BB | AA | AA |
| RS16957709 | 43702948 | AA | AA | AA | AA |
| RS2242069  | 43713634 | AA | AA | BB | BB |
| RS3803339  | 43724532 | AA | AA | AA | AA |
| RS2602141  | 43724646 | AA | AA | BB | BB |
| RS16957730 | 43730486 | AA | AA | AA | AA |
| RS45482998 | 43733730 | AA | AA | AA | AA |
| RS45470395 | 43733766 | AA | AA | AA | AA |
| RS689647   | 43762196 | BB | BB | AA | AA |
| RS17782608 | 43768642 | AA | AA | BB | BB |
| RS12898231 | 43782785 | AA | AA | AA | AA |
| RS17782975 | 43798039 | AA | AA | AA | AA |
| RS3803335  | 43817225 | BB | BB | BB | BB |
| RS45569034 | 43818926 | BB | BB | BB | BB |
| RS11635852 | 43929764 | BB | BB | BB | BB |
| RS12595401 | 43931682 | BB | BB | BB | BB |
| RS8042868  | 43939642 | BB | BB | BB | BB |
| RS7175525  | 43995380 | AA | AA | BB | BB |
| RS2467402  | 44024490 | BB | BB | BB | BB |
| RS12901165 | 44036858 | BB | BB | BB | BB |
| RS3087657  | 44063859 | AA | AA | AA | AA |
| RS35454865 | 44067985 | AA | AA | AA | AA |
| RS3844075  | 44068160 | BB | BB | BB | BB |
| RS12702    | 44093927 | AA | AA | AA | AA |
| RS34623235 | 44120340 | BB | BB | BB | BB |
| RS678084   | 44120559 | BB | BB | BB | BB |
| RS2918947  | 44123073 | BB | BB | BB | BB |
| RS11854565 | 44148142 | BB | BB | BB | BB |
| RS3742984  | 44163528 | AA | AA | AA | AA |
| RS12442297 | 44168470 | BB | BB | BB | BB |
| RS12906333 | 44170045 | AA | AA | AA | AA |



|            |          |    |    |    |    |
|------------|----------|----|----|----|----|
| RS524908   | 44187991 | AA | AA | AA | AA |
| RS1439116  | 44209446 | BB | BB | BB | BB |
| RS1545182  | 44216110 | AA | AA | AA | AA |
| RS7178452  | 44242039 | BB | BB | BB | BB |
| RS28431326 | 44259856 | BB | BB | BB | BB |
| RS17582478 | 44271206 | AA | AA | AA | AA |
| RS7168522  | 44314337 | BB | BB | BB | BB |
| RS17504748 | 44326570 | AA | AA | AA | AA |
| RS4923971  | 44328112 | BB | BB | BB | BB |
| RS12907002 | 44347500 | AA | AA | AA | AA |
| RS958485   | 44350065 | BB | BB | BB | BB |
| RS10459588 | 44365946 | AA | AA | AA | AA |
| RS12903579 | 44373887 | AA | AA | AA | AA |
| RS17583428 | 44380224 | BB | BB | AA | AA |
| RS16959468 | 44382398 | AA | AA | AA | AA |
| RS2623016  | 44401266 | AA | AA | AA | AA |
| RS34680070 | 44433196 | BB | BB | BB | BB |
| RS12910886 | 44457653 | AA | AA | AA | AA |
| RS17506480 | 44473172 | AA | AA | AA | AA |
| RS28421746 | 44481107 | BB | BB | BB | BB |
| RS2706464  | 44486511 | BB | BB | BB | BB |
| RS7178082  | 44493567 | AA | AA | AA | AA |
| RS2615260  | 44505872 | BB | BB | BB | BB |
| RS10400813 | 44535366 | AA | AA | AA | AA |
| RS8024461  | 44582886 | AA | AA | AA | AA |
| RS2412864  | 44598642 | AA | AA | AA | AA |
| RS12595484 | 44602551 | AA | AA | AA | AA |
| RS1021800  | 44609796 | AA | AA | AA | AA |
| RS7164866  | 44635729 | AA | AA | AA | AA |
| RS2055061  | 44722739 | BB | BB | BB | BB |
| RS10518985 | 44724287 | BB | BB | BB | BB |
| RS17586255 | 44728169 | AA | AA | AA | AA |
| RS34732486 | 44762423 | AA | AA | AA | AA |
| RS2453274  | 44774202 | BB | BB | BB | BB |
| RS34327950 | 44778639 | BB | BB | BB | BB |
| RS883943   | 44788705 | BB | BB | BB | BB |
| RS4611428  | 44815160 | BB | BB | BB | BB |
| RS2556560  | 44821843 | AA | AA | AA | AA |
| RS10518980 | 44822774 | AA | AA | AA | AA |
| RS28409610 | 44827024 | BB | BB | BB | BB |
| RS17586936 | 44847394 | AA | AA | AA | AA |
| RS2303578  | 44849698 | BB | BB | BB | BB |
| RS17586985 | 44851244 | BB | BB | BB | BB |
| RS12594905 | 44881964 | AA | AA | AA | AA |
| RS17515394 | 44898870 | AA | AA | AA | -- |
| RS36014111 | 44900675 | BB | BB | BB | BB |
| RS12594578 | 44934061 | BB | BB | BB | BB |
| RS3759871  | 44943757 | AA | AA | AA | AA |

|            |          |    |    |    |    |
|------------|----------|----|----|----|----|
| RS3759875  | 44943958 | AA | AA | AA | AA |
| RS7165146  | 44951174 | AA | AA | AA | AA |
| RS12594463 | 44984631 | AA | AA | AA | AA |
| RS4099     | 44988610 | AA | AA | AA | AA |
| RS1901530  | 45005146 | BB | BB | BB | BB |
| RS11553037 | 45007770 | BB | BB | BB | BB |
| RS2290330  | 45021227 | BB | BB | AA | AA |
| RS17588305 | 45021766 | AA | AA | BB | BB |
| RS3759878  | 45028587 | AA | AA | AA | AA |
| RS2444004  | 45040512 | BB | BB | BB | BB |
| RS2444006  | 45043972 | BB | BB | BB | BB |
| RS7182597  | 45045260 | AA | AA | AA | AA |
| RS2470911  | 45047134 | BB | BB | AA | AA |
| RS17588988 | 45047402 | AA | AA | AA | AA |
| RS3759883  | 45048841 | BB | BB | AA | AA |
| RS7182022  | 45069742 | AA | AA | BB | BB |
| RS8023560  | 45072082 | BB | BB | AA | AA |
| RS2462043  | 45074519 | BB | BB | BB | BB |
| RS1720726  | 45076085 | AA | AA | AA | AA |
| RS35922426 | 45078790 | BB | BB | BB | BB |
| RS2049333  | 45085225 | AA | AA | BB | BB |
| RS1295359  | 45089019 | AA | AA | BB | BB |
| RS1288092  | 45090821 | AA | AA | AA | AA |
| RS11856785 | 45094155 | BB | BB | BB | BB |
| RS2443978  | 45094624 | BB | BB | BB | BB |
| RS7172822  | 45094869 | BB | BB | BB | BB |
| RS10152725 | 45095196 | BB | BB | BB | BB |
| RS17518970 | 45095902 | AA | AA | BB | BB |
| RS2924123  | 45096023 | BB | BB | AA | AA |
| RS16974812 | 45096283 | BB | BB | BB | BB |
| RS16952664 | 45096539 | AA | AA | AA | AA |
| RS16952671 | 45097181 | AA | AA | BB | BB |
| RS17592201 | 45135017 | AA | AA | BB | BB |
| RS956093   | 45202972 | BB | BB | BB | BB |
| RS13379531 | 45225352 | BB | BB | BB | BB |
| RS12902975 | 45267670 | AA | AA | AA | AA |
| RS11635836 | 45299916 | BB | BB | BB | BB |
| RS199335   | 45306556 | AA | AA | AA | AA |
| RS7183046  | 45379702 | AA | AA | AA | AA |
| RS10851420 | 45385916 | BB | BB | BB | BB |

Table S1: list of haplotypes from two families with in the shared ROH (chr15:42,254,070-45,702,800).

**Table S2**

| <b>Family</b> | <b>Affected<br/>(<i>n</i>)</b> | <b>Mutation</b>                              | <b>ExAC<br/>Frequency</b> | <b><i>In silico</i> analysis of<br/>pathogenicity</b>                                |
|---------------|--------------------------------|----------------------------------------------|---------------------------|--------------------------------------------------------------------------------------|
| 1             | 2                              | PATL2 NM_001145112.1:c.478C>T:p.(Arg160*)    | 0.00003362                | Truncation of 383<br>amino acids                                                     |
| 2             | 2                              | PATL2 NM_001145112.1:c.1108G>A:p.(Gly370Arg) | 0                         | PolyPhen:<br>possibly_damaging<br>(0.915)<br>SIFT:<br>deleterious (0.03)<br>CADD: 33 |

**Table S2:** Variants identified in *PATL2* in two families.
